# Supplementary material
Source: publisher figshare collection journal article supplement (https://wiley.figshare.com/ndownloader/files/18117353)
Supplement: Supplementary file 1 [file 18117353]

## Sheet: Description
Data description
Data were collected in the growing seasons from March to October 2015 and 2016 at a site located near Brno, Czech Republic.
The site contains 11 sampling points equally distributed on a straight line, perpendicular to the border between
the field and the forest. Sampling points are located every 3 meters, the total length of the studied site is 30 meters.
The area is naturally divided in two parts by the central sampling point, the ecotone. The distance of sampling ponits is measured from the ecotone.
The sign minus denotes the observations from the field, plus from the forest soil. The soil samples were taken 5 cm beneath the surface.
First line denotes the distance of sampling point from the ecotone (in meters).
For details see the paper
A permutation approach to the analysis of spatio-temporal data in the presence of heteroscedasticity
Authors: Veronika Rimalova, Alessandra Menafoglio, Alessia Pini, Vilem Pechanec, Eva Fiserova
Contact address: veronika.rimalova@upol.cz
submitted to Envirometrics, July 25, 2019
Lists:
pH H2O	water pH
pH KCl	potassium chloride pH
C	percentage of organic carbon

## Sheet: pH H2O
month	-15	-12	-9	-6	-3	0	3	6	9	12	15	-15	-12	-9	-6	-3	0	3	6	9	12	15
march	4.72	4.77	4.9	4.79	4.92	4.62	3.81	3.68	4.41	4.15	4.08	5.21	5.52	5.2	4.96	5.07	4.12	3.81	3.74	3.85	3.85	3.8
april	4.91	4.77	4.88	4.55	4.78	4.11	3.86	3.69	3.67	3.59	3.48	5.6	5.39	5.42	5.25	5.08	4.9	4.49	3.65	3.91	3.77	3.57
may	4.43	4.38	4.41	5.03	4.77	3.52	3.23	3.94	3.53	3.46	3.81	3.58	5.31	5.98	5.03	5.31	4.55	3.79	3.78	3.75	3.63	3.72
june	4.44	4.65	4.37	4.53	4.59	3.61	3.79	3.55	3.59	3.5	3.52	5.28	5.49	5.68	5.26	5.36	4.98	4.08	3.68	3.84	3.89	4.01
july	4.61	5.16	4.07	4.93	4.52	4.64	3.73	3.65	3.42	3.77	3.71	5.45	4.78	5.34	5.17	4.42	3.9	4.01	3.65	3.45	3.2	3.17
august	5.29	4.7	5.08	4.69	4.72	4.89	3.63	3.39	3.56	3.24	3.69	4.89	5.33	5.36	4.81	5.08	4.26	3.9	3.78	3.33	3.65	3.49
september	4.91	4.43	5.15	5.19	5.52	4.04	3.67	3.95	3.52	3.18	3.53	5.07	4.9	4.91	4.5	4.56	4.25	3.84	3.59	3.22	3.35	3.39
october	5.01	5.06	4.99	5.03	4.95	4.61	4.02	3.75	3.91	3.81	3.97	4.88	5.55	4.98	5.22	5.14	4.85	4.52	4.32	3.89	3.89	4.22
year	2015	2015	2015	2015	2015	2015	2015	2015	2015	2015	2015	2016	2016	2016	2016	2016	2016	2016	2016	2016	2016	2016

## Sheet: pH KCl
month	-15	-12	-9	-6	-3	0	3	6	9	12	15	-15	-12	-9	-6	-3	0	3	6	9	12	15
march	3.13	3.74	3.83	3.9	3.95	4.05	3.26	3.2	3.85	3.5	3.37	3.89	4.77	4.41	4.08	4.2	3.47	3.19	3.23	3.16	3.16	3.14
april	3.87	3.73	3.81	3.86	4.05	3.52	3.47	3.24	3.31	3.12	3.4	4.64	4.15	4.47	4.24	4.18	4.05	3.7	3.07	3.21	3.2	3.12
may	3.61	3.62	3.59	4.04	3.97	3.06	2.98	3.08	3.09	3.04	3.19	3.33	4.47	4.85	4.35	4.72	4.11	3.61	3.57	3.24	3.33	3.48
june	3.82	4.02	3.72	3.84	4.03	3.17	3.15	3.12	3.06	2.89	3.1	4.33	4.56	4.76	4.29	4.6	4.5	3.55	3.35	3.4	3.29	3.61
july	3.47	3.54	3.2	3.47	3.39	3.75	2.96	3.09	2.83	3.09	2.78	4.57	4.43	4.83	4.61	4.08	3.64	3.8	3.39	3.22	3.09	3.06
august	4.09	3.67	4.1	3.55	3.71	3.66	3.34	2.85	3.07	2.88	3.03	4.32	4.68	4.66	4.16	4.58	3.78	3.59	3.47	3.22	3.51	3.46
september	4.2	3.6	3.75	3.85	4.32	3.01	3.28	3.17	3.02	2.85	3.09	4.65	4.4	4.48	4.19	4.34	3.94	3.57	3.47	3.16	3.22	3.22
october	3.83	3.89	3.95	3.52	3.86	3.67	3.37	3.18	3.24	3.17	3.27	4.39	4.02	4.59	4.19	4.42	3.76	3.55	3.49	3.09	3.38	3.46
year	2015	2015	2015	2015	2015	2015	2015	2015	2015	2015	2015	2016	2016	2016	2016	2016	2016	2016	2016	2016	2016	2016

## Sheet: C
month	-15	-12	-9	-6	-3	-15	-12	-9	-6	-3	0	3	6	9	12	15
march	1.32275	1.42857	1.93122	2.38095	0.899471	2.36	3.06	2.32	2.19	1.72	4.14	3.66	4.87	3.03	4.87	4.83
april	2.32804	1.61376	1.79894	2.48677	2.98942	2.13	2.15	1.7	2.62	2.87	3.28	3.97	2.8	3.66	4.22	4.04
may	4.4709	2.61905	3.22751	3.9418	4.60317	2.66	2.38	2.14	2.67	3.75	3.57	4.41	4.08	4.53	4.03	3.67
june	3.35979	2.77778	3.43915	4.97354	4.81481	2.98	2.8	2.34	2.97	2.84	4.44	4.23	4.5	3.63	4.49	3.09
july	3.28042	3.67725	2.59259	2.85714	3.1746	2.41	2.345	2.575	2.74	2.915	2.475	4.29	5.2	5.34	4.18	5.68
august	2.77778	2.69841	3.73016	2.3545	2.75132	2.87	2.835	2.725	2.685	3.2	3.475	5.51	4.695	3.475	2.825	3.035
september	2.6455	2.56614	3.01587	3.20106	4.36508	3.05	2.82	3.235	2.995	3.905	3.755	4.805	3.84	3.43	5.17	4.53
october	2.38095	2.46032	2.6455	2.61905	3.54497	1.155	1.91	2.365	2.14	3.13	3.435	2.87	3.645	4.715	3.3	2.285
year	2015	2015	2015	2015	2015	2016	2016	2016	2016	2016	2016	2016	2016	2016	2016	2016
